# Supplementary material
Source: PubMed Central journal article supplement (PMC2758099)
Supplement: NIHMS108541-supplement-Supplemental_data.pdf [file NIHMS108541-supplement-Supplemental_data.pdf]

**CHEMISTRY**   
**A EUROPEAN JOURNAL**

Supporting Information

© Copyright Wiley-VCH Verlag GmbH & Co. KGaA, 69451 Weinheim, 2008

# **Synthesis and Relaxometric Studies of a Dendrimer-based pH responsive MRI Contrast Agent**

M. Meser Ali,<sup>[a]</sup> Mark Woods,<sup>[a,b]</sup> Peter Caravan,<sup>[c]</sup> Ana C.L. Opina,<sup>[a]</sup> Marga Spiller,<sup>[d]</sup>  
James C. Fettinger,<sup>[e]</sup> A. Dean Sherry<sup>[a,f]\*</sup>

- a) *Department of Chemistry, University of Texas at Dallas, P.O. Box 830660, Richardson, Texas 75083*
- b) *Macrocyclics, 2110 Research Row, Suite 425, Dallas, Texas 75235*
- c) *A.A. Martinos Center for Biomedical Imaging, Department of Radiology, Massachusetts General Hospital and Harvard Medical School, Charlestown, MA 02129, (UNITED STATES).*
- d) *Department of Radiology, New York Medical College, Valhalla, New York 10595, (UNITED STATES).*
- e) *Department of Chemistry, University of California at Davis, One Shields Avenue, Davis, CA 95616-5298, (UNITED STATES).*
- f) *Advanced Imaging Research Center, University of Texas Southwestern Medical Center, 5323 Harry Hines Boulevard, Dallas, Texas 75390*

## Electronic Supplementary Information S1

**Table S1.** Crystallographic data for **5**

|                                   |                                                                              |          |
|-----------------------------------|------------------------------------------------------------------------------|----------|
| Identification code               | jf1426ffmi                                                                   |          |
| Empirical formula                 | C <sub>18</sub> H <sub>30</sub> N <sub>2</sub> O <sub>8</sub> P <sub>2</sub> |          |
| Formula weight                    | 464.38                                                                       |          |
| Temperature                       | 90(2) K                                                                      |          |
| Wavelength                        | 0.71073 Å                                                                    |          |
| Crystal system                    | Orthorhombic                                                                 |          |
| Space group                       | P n a 2 <sub>1</sub>                                                         |          |
| Unit cell dimensions              | a = 19.2299(12) Å                                                            | α = 90°. |
|                                   | b = 15.1795(9) Å                                                             | β = 90°. |
|                                   | c = 15.6480(10) Å                                                            | γ = 90°. |
| Volume                            | 4567.7(5) Å <sup>3</sup>                                                     |          |
| Z                                 | 8                                                                            |          |
| Density (calculated)              | 1.351 Mg/m <sup>3</sup>                                                      |          |
| Absorption coefficient            | 0.236 mm <sup>-1</sup>                                                       |          |
| F(000)                            | 1968                                                                         |          |
| Crystal size                      | 0.46 x 0.41 x 0.25 mm <sup>3</sup>                                           |          |
| Crystal color and habit           | Colorless Irregular Block                                                    |          |
| Diffractometer                    | Bruker SMART1000                                                             |          |
| Theta range for data collection   | 1.71 to 30.00°.                                                              |          |
| Index ranges                      | -27 = h = 27, -21 = k = 21, -22 = l = 22                                     |          |
| Reflections collected             | 51060                                                                        |          |
| Independent reflections           | 13322 [R(int) = 0.0393]                                                      |          |
| Observed reflections (I > 2σ(I))  | 11744                                                                        |          |
| Completeness to theta = 30.00°    | 100.0 %                                                                      |          |
| Absorption correction             | SADABS, Analytical                                                           |          |
| Max. and min. transmission        | 0.9430 and 0.8994                                                            |          |
| Solution method                   | SHELXS-97 (Sheldrick, 1990)                                                  |          |
| Refinement method                 | SHELXL-97 (Sheldrick, 1997) Full-matrix least-squares on F <sup>2</sup>      |          |
| Data / restraints / parameters    | 13322 / 27 / 645                                                             |          |
| Goodness-of-fit on F <sup>2</sup> | 1.118                                                                        |          |
| Final R indices [I > 2σ(I)]       | R1 = 0.0572, wR2 = 0.1202                                                    |          |
| R indices (all data)              | R1 = 0.0655, wR2 = 0.1239                                                    |          |
| Absolute structure parameter      | 0.38(9)                                                                      |          |
| Largest diff. peak and hole       | 0.450 and -0.458 e.Å <sup>-3</sup>                                           |          |

Electronic Supplementary Information S2

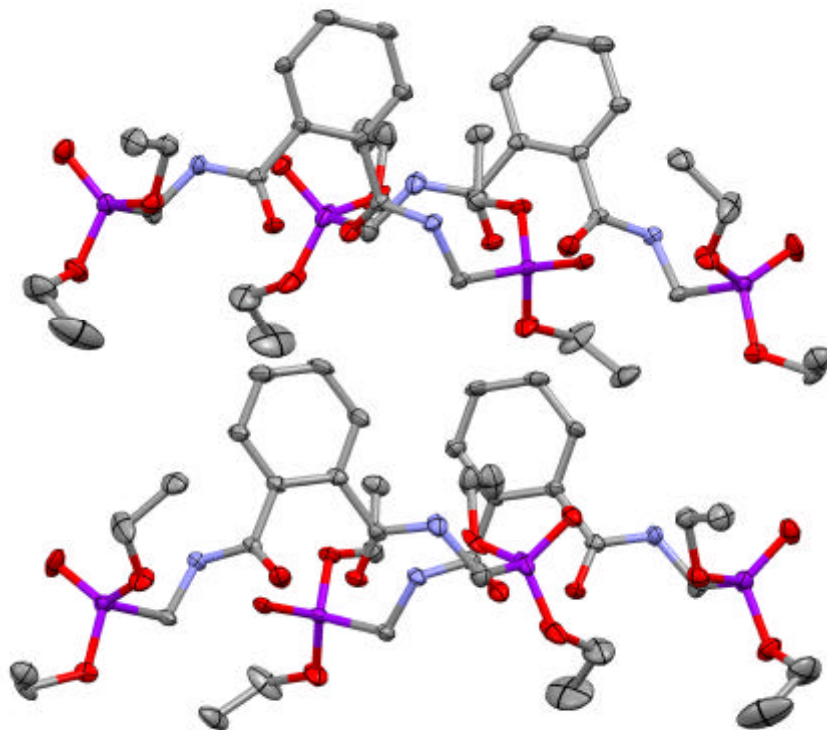

**Figure S1.** Packing diagram of the crystal structure of **5** view down the c-axis

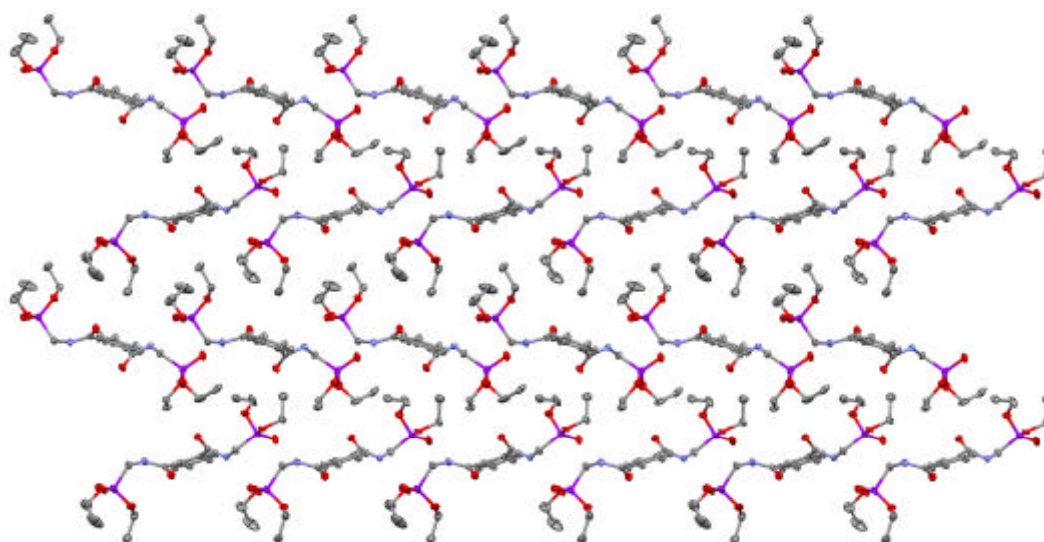

**Figure S2.** Packing diagram of the crystal structure of **5** view down the b-axis
